# Supplementary material for: Exploring the Relationship between Built Environment Attributes and Physical Activity in Lower-Income Aging Adults: Preliminary Insights from a Multi-Level Trial
Source: MDPI journal article supplement (doi:10.3390/ijerph21050607), 2024-05-09
Supplement: s1 [file s1]

**Table S1:** Crude associations between demographics and physical activity variables in the analytic sample (N=255)

| Median (Q1, Q3)                      |     |                            |                       |                         |
|--------------------------------------|-----|----------------------------|-----------------------|-------------------------|
|                                      | n   | Total walking<br>(min/wk.) | Total PA<br>(min/wk.) | Total MVPA<br>(min/wk.) |
| <b>Sex</b>                           |     |                            |                       |                         |
| Male                                 | 67  | 90 (0, 180)                | 540 (330, 810)        | 15 (0, 100)             |
| Female                               | 188 | 90 (0, 200)                | 525 (325, 787.50)     | 5 (0, 97.50)            |
| P (ANOVA)                            |     | 0.78                       | 0.82                  | 0.58                    |
| <b>Race/ethnicity</b>                |     |                            |                       |                         |
| African American/Black, non-Hispanic | 7   | 70 (0, 150)                | 385 (360, 680)        | 0 (0, 50)               |
| Asian, non-Hispanic                  | 40  | 85 (0, 170)                | 465 (282.5, 765)      | 30 (0, 155)             |
| Native American, non-Hispanic        | 1   | 225                        | 1435                  | 70                      |
| White, non-Hispanic                  | 154 | 90 (0, 210)                | 540 (330, 825)        | 0 (0, 90)               |
| Refused race, non-Hispanic           | 1   | 30                         | 650                   | 80                      |
| Latino/Hispanic ethnicity            | 49  | 90 (0, 155)                | 495 (315, 765)        | 30 (0, 90)              |
| Two or more/mixed race               | 3   | 120 (0, 280)               | 1080 (455, 1275)      | 270 (0, 310)            |
| P (ANOVA)                            |     | 0.29                       | 0.02**                | 0.11                    |
| <b>Education</b>                     |     |                            |                       |                         |
| Less than high school                | 6   | 90 (0, 280)                | 315 (255, 840)        | 15 (0, 380)             |
| High school or equivalent            | 43  | 80 (20, 180)               | 555 (350, 765)        | 30 (0, 90)              |
| College                              | 131 | 90 (0, 210)                | 495 (290, 825)        | 0 (0, 90)               |
| Post-graduate                        | 74  | 82.50 (0, 175)             | 525 (360, 735)        | 5 (0, 100)              |
| Other                                | 1   | 180                        | 765                   | 120                     |
| P (ANOVA)                            |     | 0.75                       | 0.83                  | 0.44                    |
| <b>Participant age group</b>         |     |                            |                       |                         |
| <65 years old                        | 78  | 90 (0, 180)                | 540 (360, 765)        | 30 (0, 120)             |
| Older adults (≥ 65)                  | 177 | 90 (0, 180)                | 525 (325, 805)        | 0 (0, 90)               |
| P (ANOVA)                            |     | 0.78                       | 0.82                  | 0.58                    |
| <b>Education</b>                     |     |                            |                       |                         |
| Less than high school                | 6   | 90 (0, 280)                | 315 (255, 840)        | 15 (0, 380)             |
| High school or equivalent            | 43  | 80 (20, 180)               | 555 (350, 765)        | 30 (0, 90)              |
| College                              | 131 | 90 (0, 210)                | 495 (290, 825)        | 0 (0, 90)               |
| Post-graduate                        | 74  | 82.50 (0, 175)             | 525 (360, 735)        | 5 (0, 100)              |
| Other                                | 1   | 180                        | 765                   | 120                     |
| P (ANOVA)                            |     | 0.75                       | 0.83                  | 0.44                    |
| <b>Housing site</b>                  |     |                            |                       |                         |
| Site A                               | 14  | 50 (0, 180)                | 495 (270, 825)        | 25 (0, 150)             |
| Site B                               | 15  | 125 (30, 210)              | 810 (360, 900)        | 0 (0, 60)               |
| Site C                               | 21  | 150 (0, 240)               | 450 (300, 630)        | 0 (0, 60)               |

|                              |    |                |                        |               |
|------------------------------|----|----------------|------------------------|---------------|
| <i>Site D</i>                | 14 | 170 (0, 315)   | 547.50 (375, 795)      | 40 (0, 120)   |
| <i>Site E</i>                | 16 | 75 (0, 245)    | 667.50 (502.5, 832.50) | 0 (0, 35)     |
| <i>Site F</i>                | 15 | 60 (0, 330)    | 495 (360, 795)         | 0 (0, 180)    |
| <i>Site G</i>                | 35 | 80 (20, 175)   | 480 (290, 720)         | 20 (0, 120)   |
| <i>Site H</i>                | 32 | 42.50 (0, 125) | 457.50 (195, 750)      | 50 (0, 100)   |
| <i>Site I</i>                | 47 | 75 (20, 120)   | 545 (360, 845)         | 10 (0, 120)   |
| <i>Site J</i>                | 46 | 100 (20, 160)  | 480 (285, 960)         | 37 (0, 120)   |
| <i>P (ANOVA)</i>             |    | <i>0.31</i>    | <i>0.44</i>            | <i>0.91</i>   |
| <b>Annual income</b>         |    |                |                        |               |
| <\$5,000                     | 2  | 60 (0, 120)    | 812.5 (765, 860)       | 92.5 (0, 185) |
| \$5,000-9,999                | 5  | 0 (0, 60)      | 270 (255, 315)         | 0 (0, 0)      |
| \$10,000-14,999              | 17 | 150 (0, 210)   | 765 (510, 965)         | 50 (0, 210)   |
| \$15,000-24,999              | 27 | 105 (20, 270)  | 525 (330, 850)         | 0 (0, 60)     |
| \$25,000-34,999              | 14 | 82.5 (0, 210)  | 315 (240, 885)         | 0 (0, 120)    |
| \$35,000-49,999              | 24 | 115 (35, 280)  | 630 (395, 865)         | 25 (0, 105)   |
| \$50,000-74,999              | 29 | 10 (0, 135)    | 450 (345, 615)         | 0 (0, 45)     |
| >\$75,000                    | 79 | 100 (30, 190)  | 525 (330, 735)         | 30 (0, 100)   |
| <i>Don't know or refused</i> | 58 | 72.5 (20, 140) | 490 (325, 735)         | 42 (0, 130)   |
| <i>P(ANOVA)</i>              |    | <i>0.11</i>    | <i>0.66</i>            | <i>0.26</i>   |

**Abbreviations:** PA = physical activity; MVPA = moderate-to-vigorous physical activity; BMI = body mass index.

**Table S2:** Descriptive statistics of PARA measures

|                                                                          | Site A            | Site B            | Site C            | Site D              | Site E                  | Site F            | Site G            | Site H              | Site I            | Site J            |
|--------------------------------------------------------------------------|-------------------|-------------------|-------------------|---------------------|-------------------------|-------------------|-------------------|---------------------|-------------------|-------------------|
| <b>Total PARs, n</b>                                                     | 21                | 34                | 32                | 26                  | 42                      | 14                | 28                | 45                  | 18                | 33                |
| <i>Park, trail, or green space, n (%)</i>                                | 5 (24)            | 7 (21)            | 5 (16)            | 4 (15)              | 8 (19)                  | 4 (29)            | 5 (18)            | 10 (22)             | 7 (39)            | 6 (18)            |
| <i>Sports facility or fitness club, n (%)</i>                            | 0 (0)             | 0 (0)             | 1 (3)             | 2 (8)               | 3 (7)                   | 3 (21)            | 8 (29)            | 1 (2)               | 1 (6)             | 8 (24)            |
| <i>Community center, n (%)</i>                                           | 3 (14)            | 6 (29)            | 2 (6)             | 5 (19)              | 8 (19)                  | 0 (0)             | 4 (14)            | 3 (7)               | 1 (6)             | 2 (6)             |
| <i>Church, n (%)</i>                                                     | 8 (38)            | 13 (62)           | 12 (38)           | 12 (46)             | 11 (26)                 | 3 (21)            | 3 (11)            | 15 (33)             | 4 (22)            | 4 (12)            |
| <i>School, n (%)</i>                                                     | 2 (10)            | 4 (19)            | 10 (31)           | 1 (4)               | 8 (19)                  | 2 (14)            | 3 (11)            | 14 (31)             | 3 (17)            | 9 (27)            |
| <i>Plaza, n (%)</i>                                                      | 2 (10)            | 0 (0)             | 1 (3)             | 1 (4)               | 2 (5)                   | 0 (0)             | 1 (4)             | 0 (0)               | 0 (0)             | 0 (0)             |
| <i>Combination<sup>a</sup>, n (%)</i>                                    | 1 (5)             | 4 (19)            | 1 (3)             | 1 (4)               | 2 (5)                   | 2 (14)            | 4 (14)            | 2 (4)               | 2 (11)            | 2 (6)             |
| <b>Normalized mean scores for PARs audited<sup>b</sup>, range 0 to 3</b> |                   |                   |                   |                     |                         |                   |                   |                     |                   |                   |
| <i>Features</i>                                                          | 0.49              | 0.45              | 0.49              | 0.60                | 0.45                    | 0.53              | 0.57              | 0.53                | 0.59              | 0.71              |
| <i>Amenities</i>                                                         | 1.13              | 1.26              | 1.33              | 1.31                | 1.21                    | 1.15              | 1.39              | 1.16                | 1.02              | 1.43              |
| <i>Incivilities</i>                                                      | 0.30              | 0.49              | 0.35              | 0.32                | 0.43                    | 0.38              | 0.32              | 0.46                | 0.24              | 0.33              |
| <b>Mean counts of PARA elements</b>                                      |                   |                   |                   |                     |                         |                   |                   |                     |                   |                   |
| <i>Features</i>                                                          | 2.14              | 2.35              | 2.31              | 2.65                | 2.02                    | 2.43              | 2.57              | 2.42                | 2.67              | 3.24              |
| <i>Amenities</i>                                                         | 5.48              | 6.62              | 6.19              | 6.04                | 5.52                    | 5.36              | 6.29              | 5.82                | 4.67              | 6.94              |
| <i>Incivilities</i>                                                      | 2.19              | 3.35              | 2.63              | 2.46                | 2.62                    | 2.50              | 2.21              | 2.89                | 1.61              | 2.36              |
| <b>Averages of PA outcomes (min/week), median (IQR)</b>                  |                   |                   |                   |                     |                         |                   |                   |                     |                   |                   |
| <i>Walking</i>                                                           | 50<br>(0, 180)    | 125<br>(30, 210)  | 150<br>(0, 240)   | 170<br>(0, 315)     | 75<br>(0, 245)          | 60<br>(0, 330)    | 80<br>(20, 175)   | 42.5<br>(0, 125)    | 75<br>(20, 120)   | 100<br>(20, 160)  |
| <i>Total PA</i>                                                          | 495<br>(270, 825) | 810<br>(360, 900) | 450<br>(300, 630) | 547.5<br>(375, 795) | 667.5<br>(502.5, 832.5) | 495<br>(360, 795) | 480<br>(290, 720) | 457.5<br>(195, 750) | 545<br>(360, 845) | 480<br>(285, 960) |
| <i>MVPA</i>                                                              | 25<br>(0, 150)    | 0<br>(0, 60)      | 0<br>(0, 60)      | 40<br>(0, 120)      | 0<br>(0, 35)            | 0<br>(0, 180)     | 20<br>(0, 120)    | 50<br>(0, 100)      | 10<br>(0, 120)    | 37<br>(0, 120)    |

**Abbreviations:** PARA = Physical Activity Resource Assessment; PARs = Physical activity resources; PA = Physical activity; MVPA = Moderate-to-vigorous physical activity

<sup>a</sup> “Combination” is used to describe a PAR that has a combination of two or more of the listed resources.

<sup>b</sup> Normalized mean scores were calculated by first calculating the mean of the items in each domain for each PAR and averaging across all of the PARs in a site to get an overall mean for each PARA domain. This results in scores on a scale of 0 to 3 for each domain.
